# Supplementary material for: The effect of radiometer placement and view on inferred directional and hemispheric radiometric temperatures of an urban canopy
Source: Copernicus journal article supplement (doi:10.5194/amt-8-2699-2015), 2015-07-03
Supplement: Supplementary file 1 [file amt-8-2699-2015-supplement.pdf]

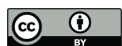

## *Supplement of*

# **The effect of radiometer placement and view on inferred directional and hemispheric radiometric temperatures of an urban canopy**

**C. Adderley et al.**

*Correspondence to:* A. Christen ([andreas.christen@ubc.ca](mailto:andreas.christen@ubc.ca))

The copyright of individual parts of the supplement might differ from the CC-BY 3.0 licence.

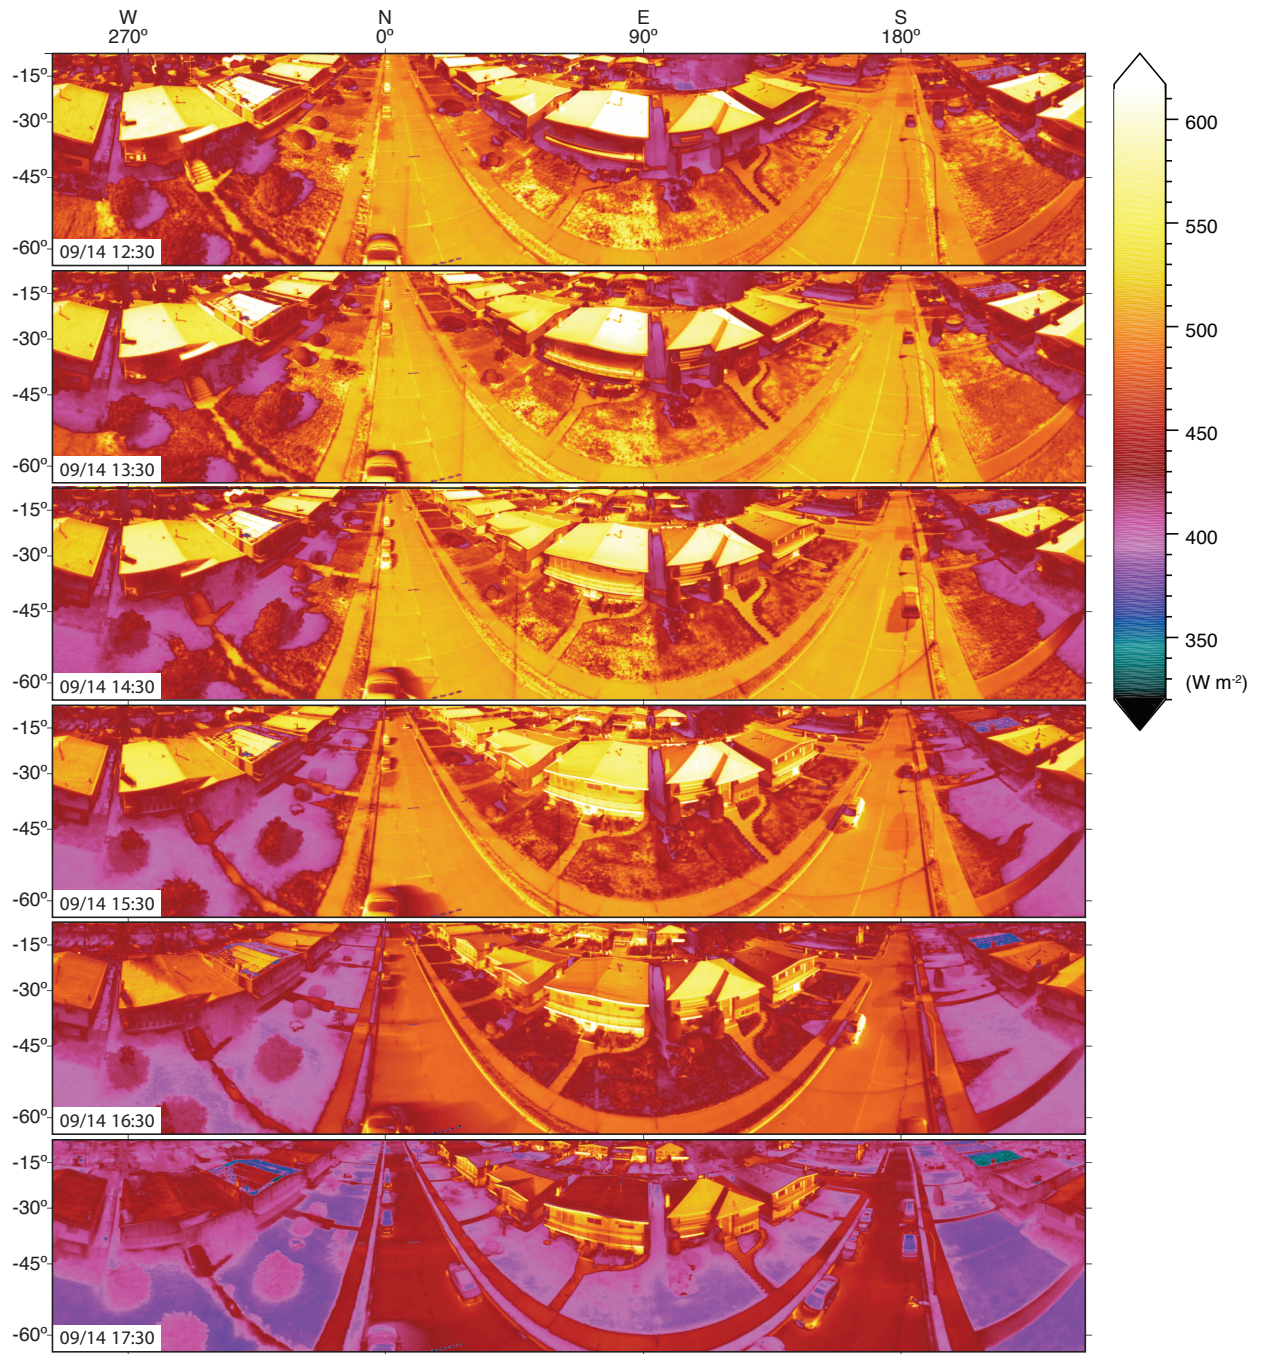

**Figure S1** - Panoramic time sequential thermography (PTST) dataset from September 14, 2008, 12:30 to 17:30. Each panorama is composed of  $\approx 120$  single images and projected using a conformal Mercator grid relative to the local horizon.

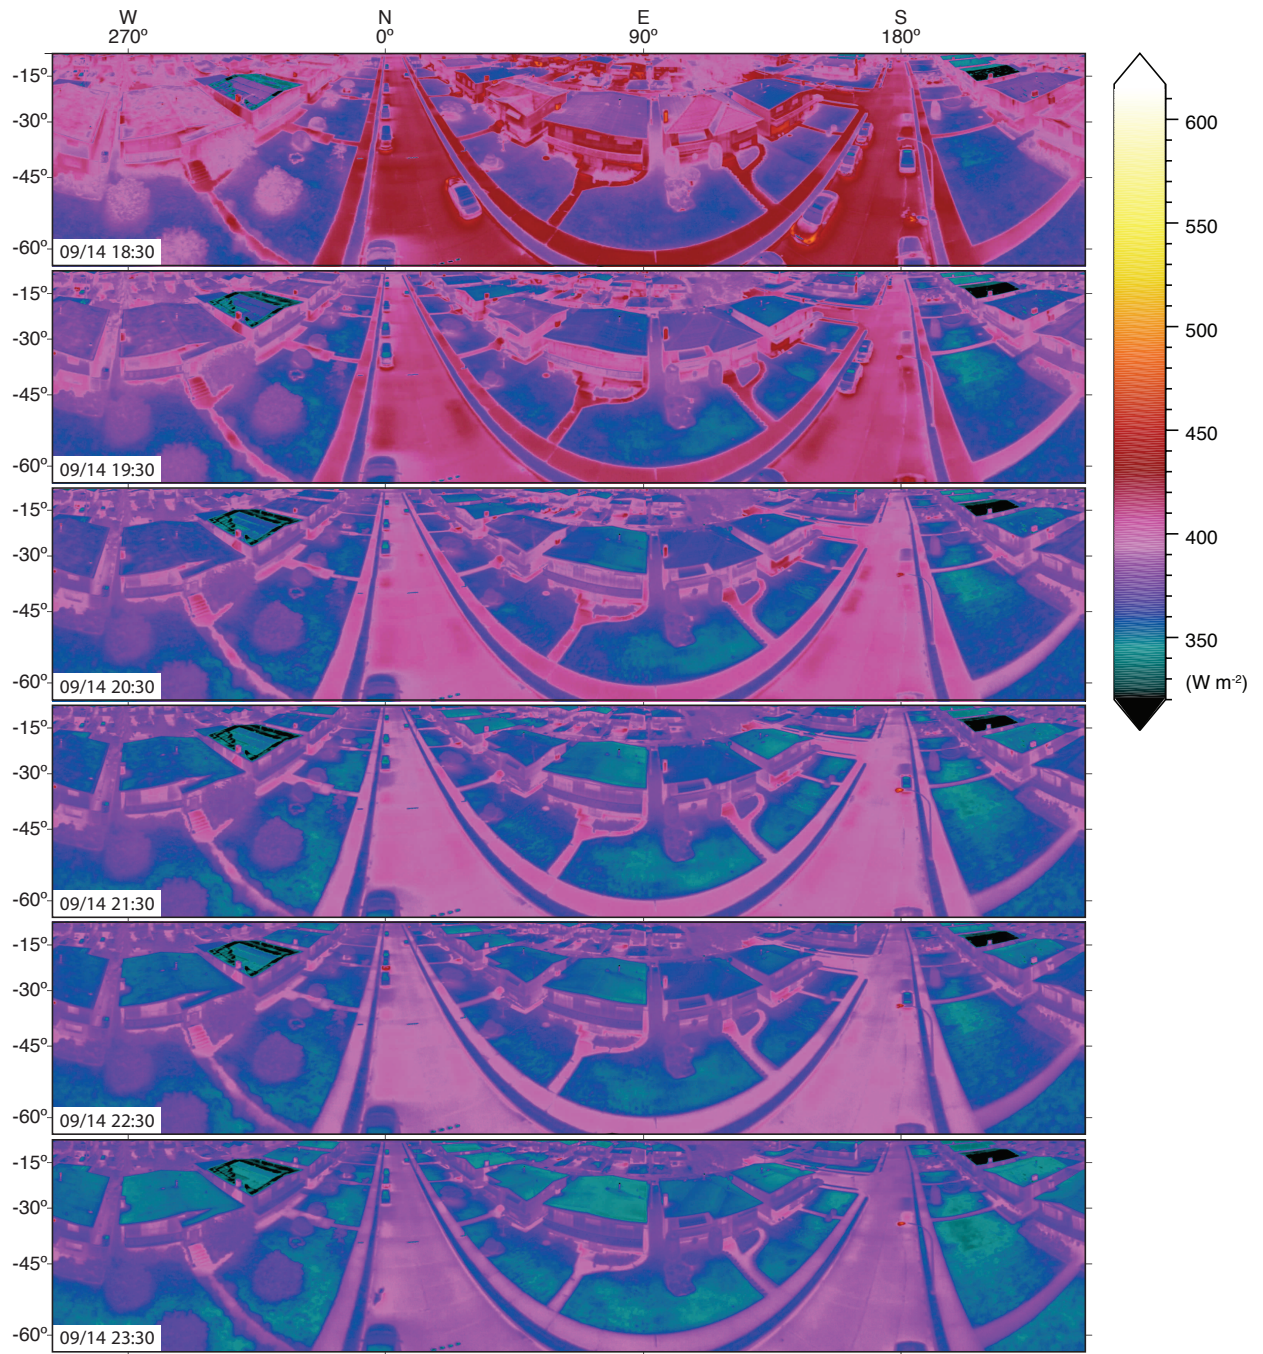

**Figure S2** - Panoramic time sequential thermography (PTST) dataset from September 14, 2008, 18:30 to 23:30. Each panorama is composed of  $\approx 120$  single images and projected using a conformal Mercator grid relative to the local horizon.

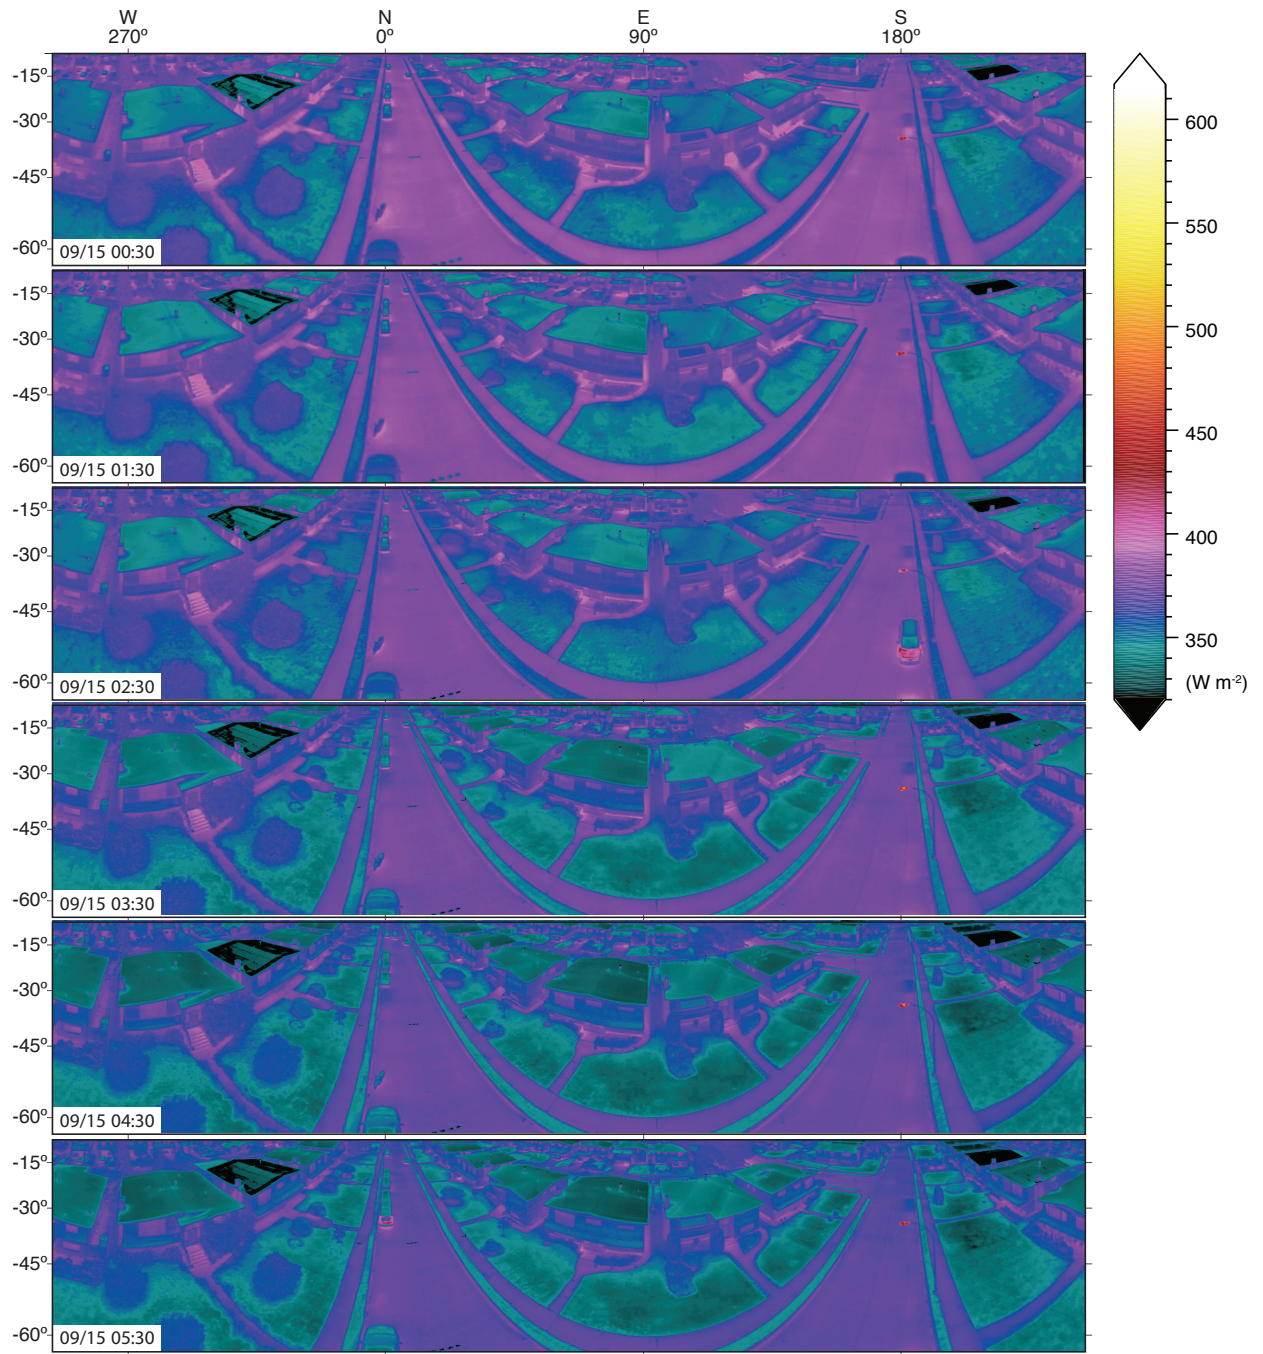

**Figure S3** - Panoramic time sequential thermography (PTST) dataset from September 15, 2008, 00:30 to 05:30. Each panorama is composed of  $\approx 120$  single images and projected using a conformal Mercator grid relative to the local horizon.

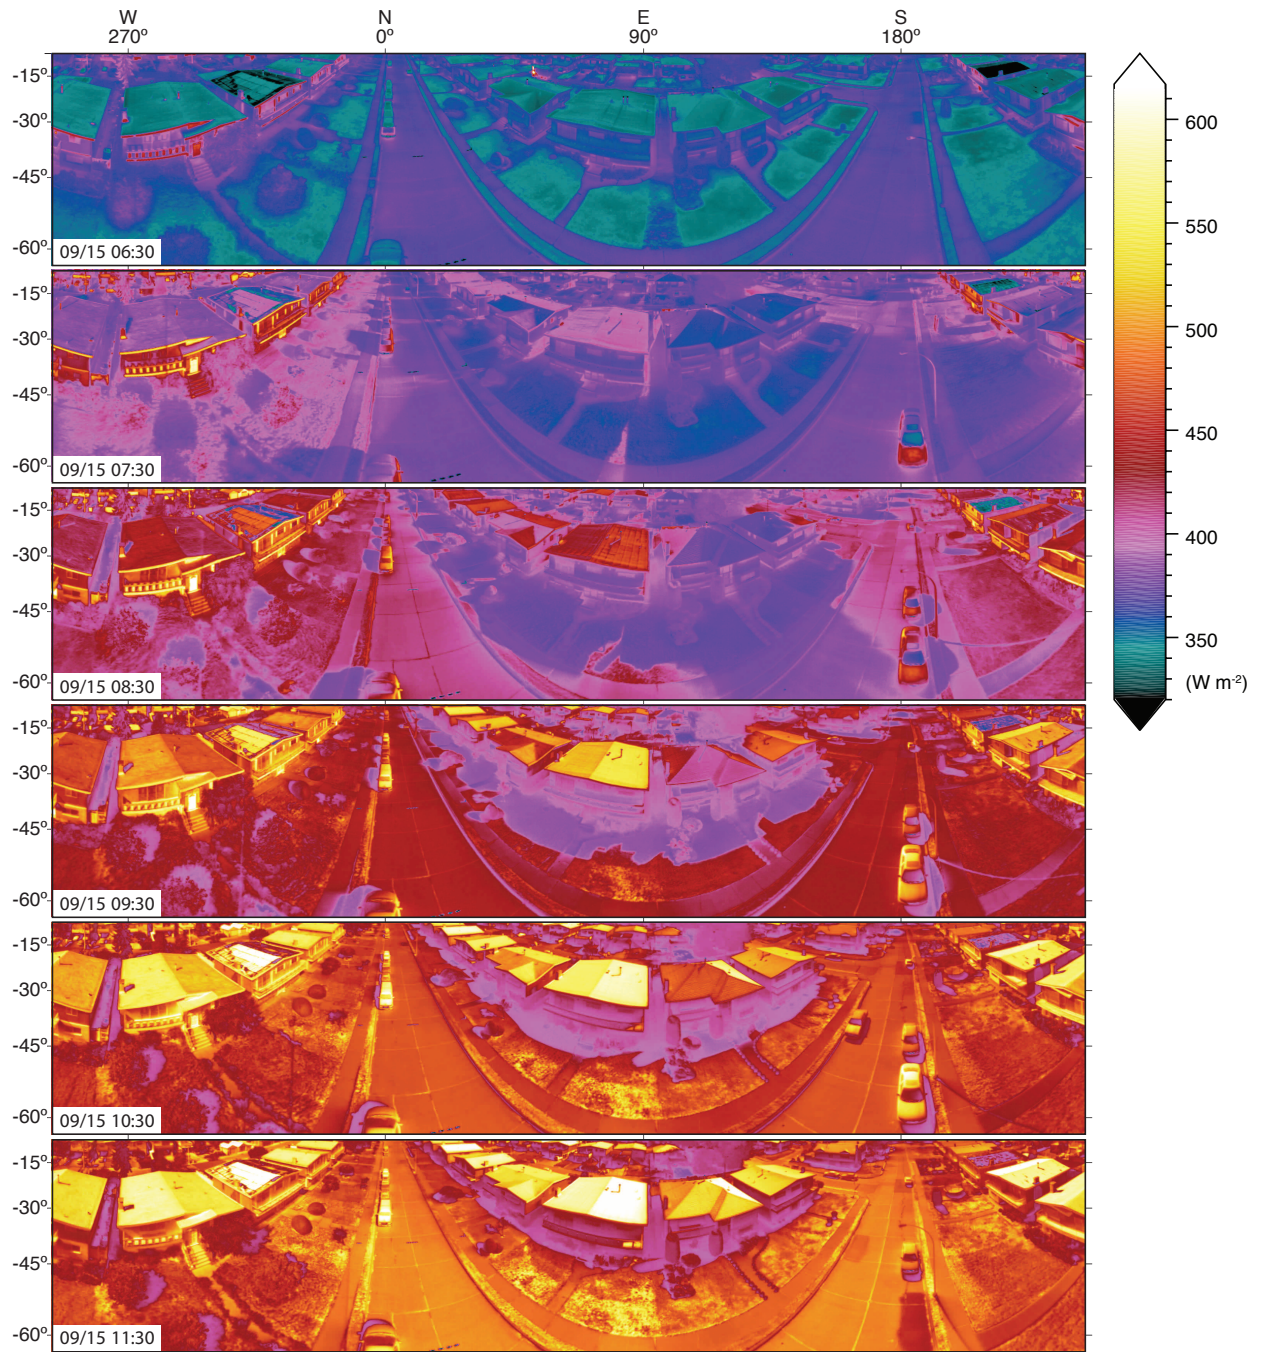

**Figure S4** - Panoramic time sequential thermography (PTST) dataset from September 15, 2008, 06:30 to 11:30. Each panorama is composed of  $\approx 120$  single images and projected using a conformal Mercator grid relative to the local horizon.

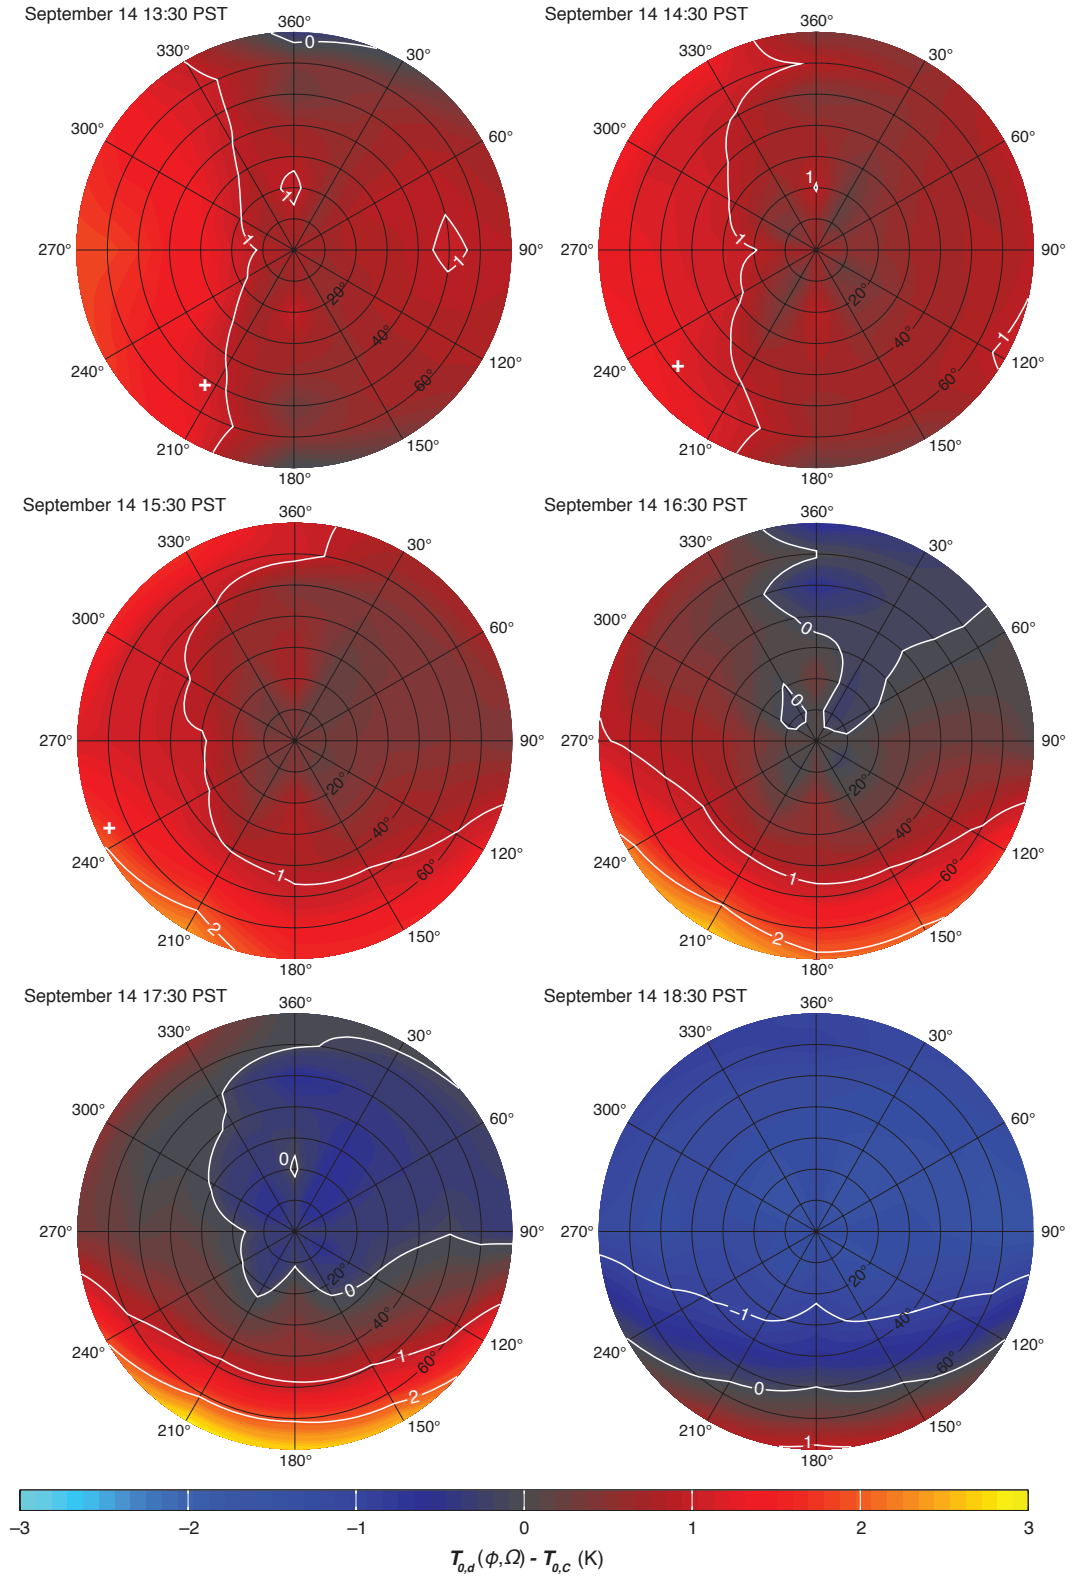

**Figure S5** - The bias  $T_{0,d} - T_{0,c}$  for sensors with a narrow IFOV in the nadir and various oblique angles similar to Figure 8 in journal article but for September 14 13:30 to September 14 18:30.

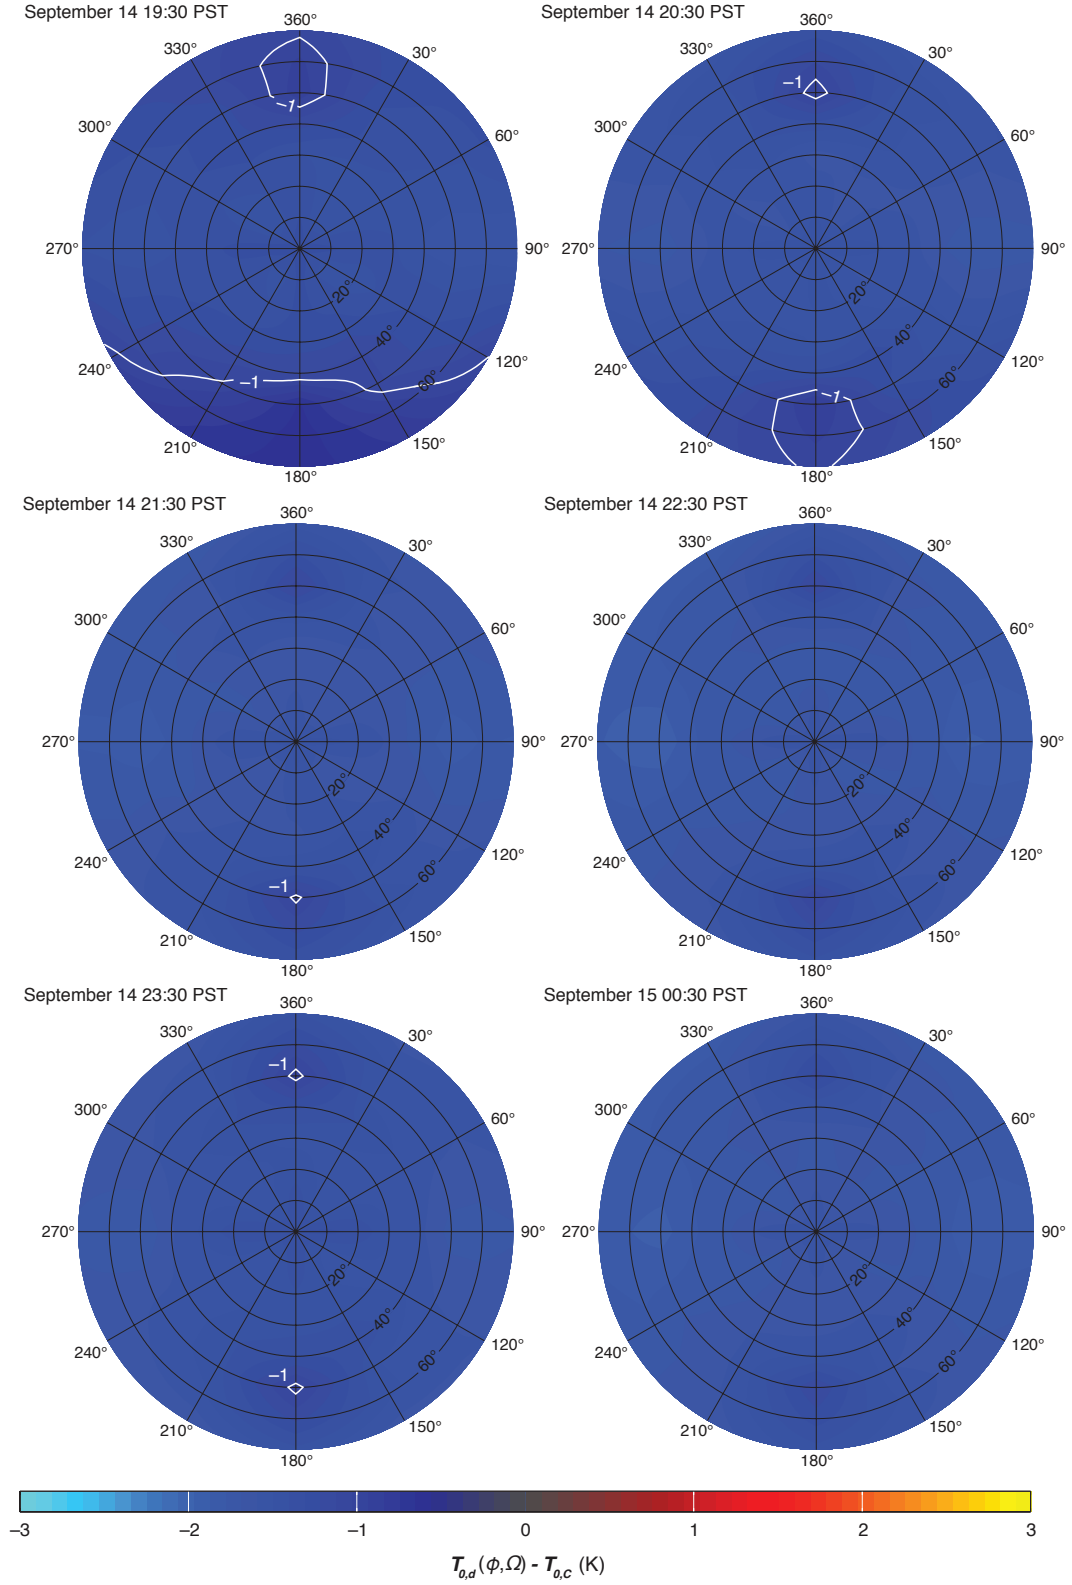

**Figure S6** -The bias  $T_{0,d} - T_{0,c}$  for sensors with a narrow IFOV in the nadir and various oblique angles similar to Figure 8 in journal article but for September 14 19:30 to September 15 00:30

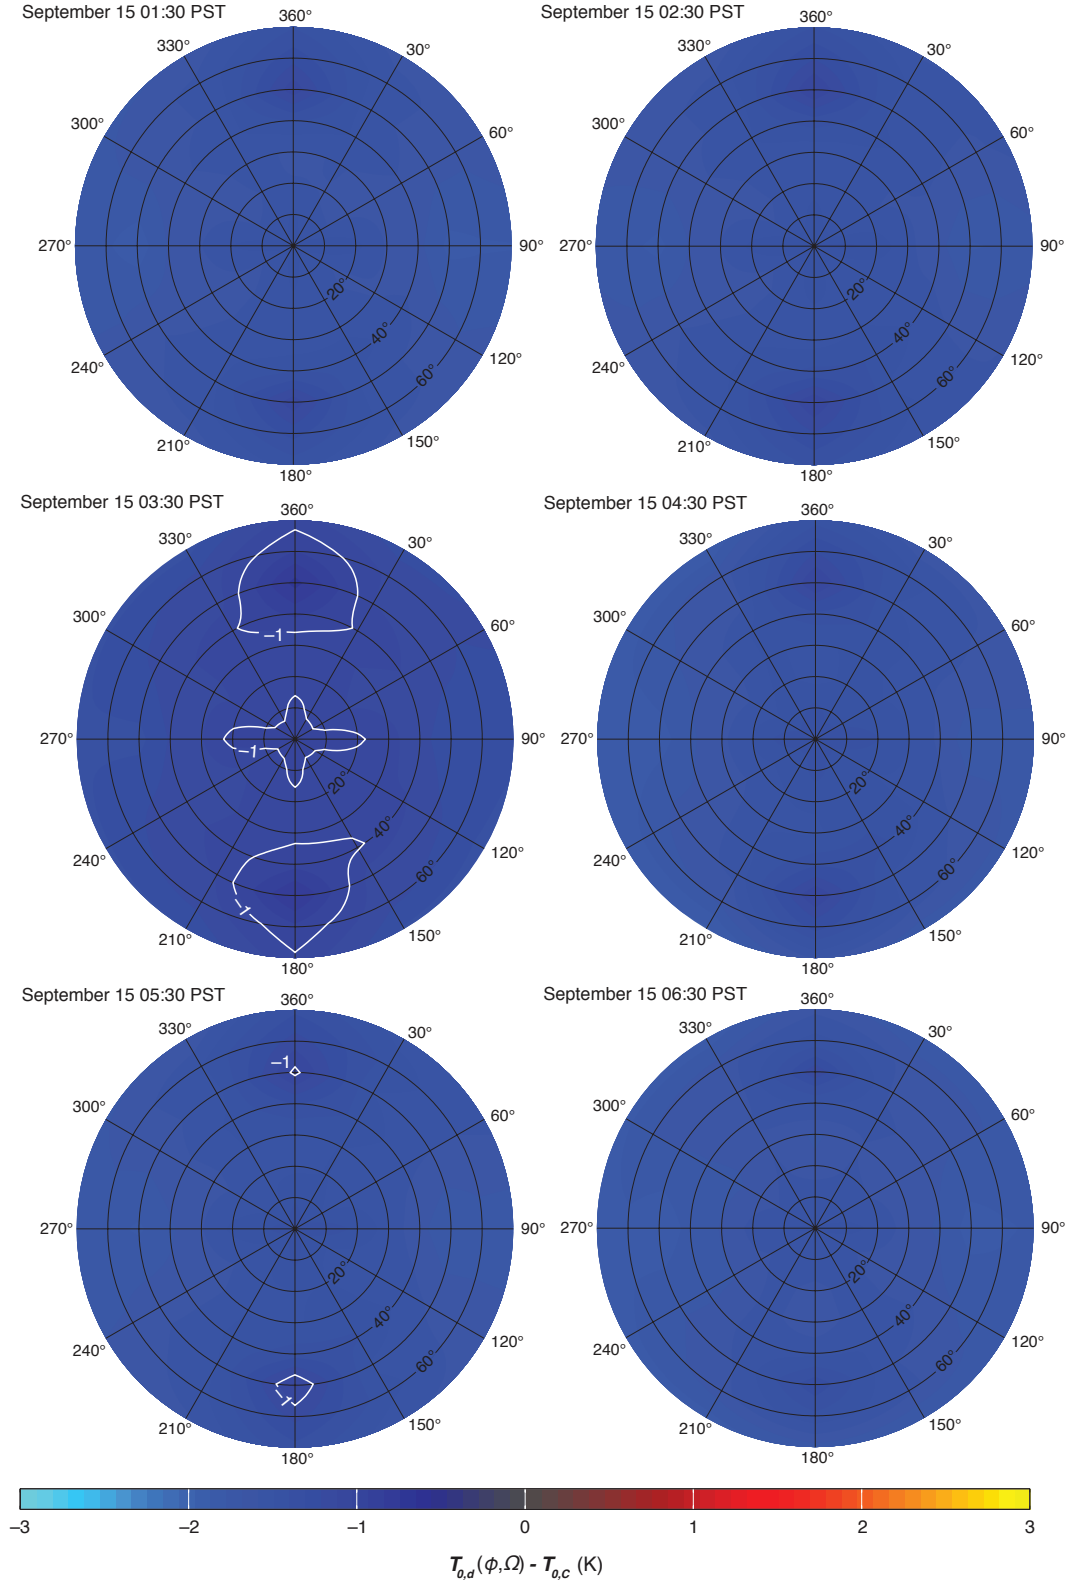

**Figure S7** - The bias  $T_{0,d} - T_{0,c}$  for sensors with a narrow IFOV in the nadir and various oblique angles similar to Figure 8 in journal article but for September 15 01:30 to September 15 06:30

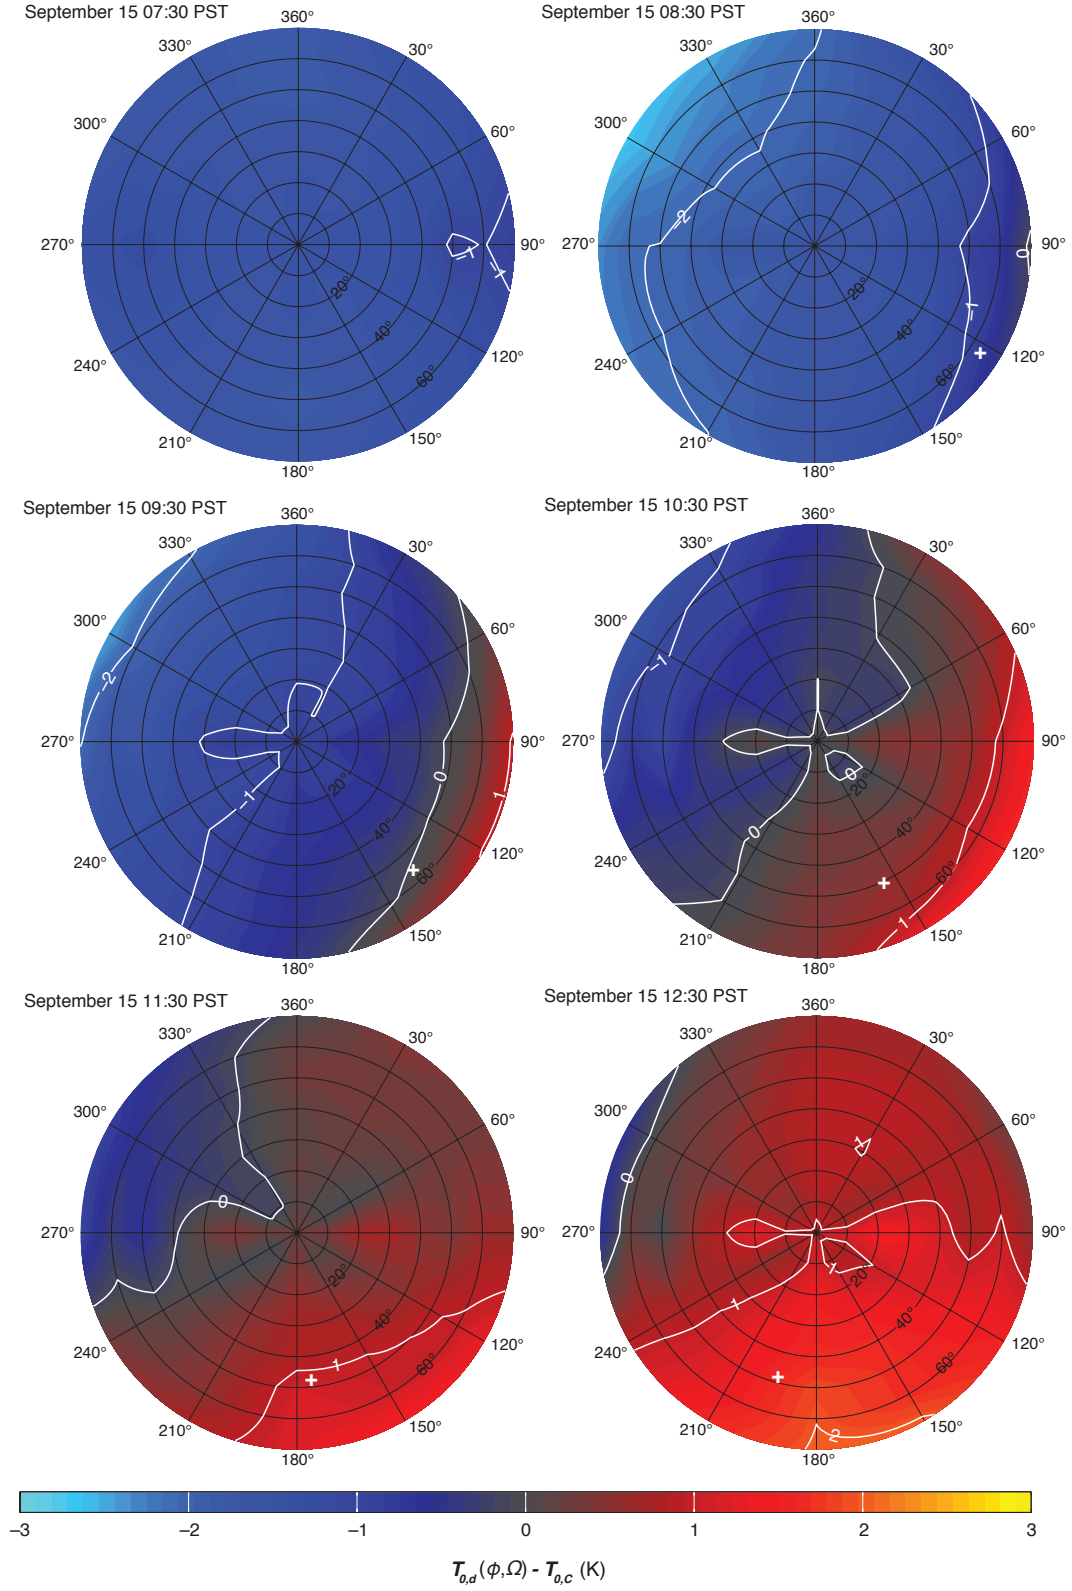

**Figure S8** - The bias  $T_{0,d} - T_{0,c}$  for sensors with a narrow IFOV in the nadir and various oblique angles similar to Figure 8 in journal article but for September 15 07:30 to September 15 12:30.
